# Supplementary material
Source: PubMed Central journal article supplement (PMC3605497)
Supplement: 726_2012_1309_MOESM1_ESM.pdf [file 726_2012_1309_MOESM1_ESM.pdf]

## Supplementary Material

### A biomimetic domino reaction for the concise synthesis of capreomycidine and epicapreomycidine

Martin Büschleb,<sup>‡</sup> Markus Granitzka,<sup>†</sup> Dietmar Stalke,<sup>†</sup> Christian Ducho<sup>‡§\*</sup>

<sup>‡</sup>Georg-August-University Göttingen, Department of Chemistry, Institute of Organic and Biomolecular Chemistry, Tammannstr. 2, 37 077 Göttingen, Germany

<sup>†</sup>Georg-August-University Göttingen, Department of Chemistry, Institute of Inorganic Chemistry, Tammannstr. 4, 37 077 Göttingen, Germany

<sup>§</sup>University of Paderborn, Department of Chemistry, Warburger Str. 100, 33 098 Paderborn, Germany

Corresponding author \*E-mail: christian.ducho@uni-paderborn.de

Table of contents

|                                                                                                                                   |     |
|-----------------------------------------------------------------------------------------------------------------------------------|-----|
| NMR-based determination of the configuration of $\delta$ -azido-didehydro $\alpha$ -amino acids<br><b>11a</b> and <b>21</b> ..... | S2  |
| <sup>1</sup> H and <sup>13</sup> C and NMR spectra of all new compounds.....                                                      | S3  |
| Data on the X-ray crystal structure of (Z)- <b>11a</b> .....                                                                      | S19 |

## NMR-based determination of the configuration of $\delta$ -azido-didehydro $\alpha$ -amino acids **11a** and **21**

Mazurkiewicz et al. have established the following  $^1\text{H}$  NMR criteria ( $\text{CDCl}_3$ ) for the distinction of (*Z*)- and (*E*)-acyl didehydro amino acids (Mazurkiewicz R, Kuźnik A, Grymel M, Kuźnik N (2005)  $^1\text{H}$  NMR spectroscopic criteria for the configuration of *N*-acyl- $\alpha,\beta$ -didehydro- $\alpha$ -amino acid esters. Magn. Reson. Chem. 43:36-40):

$$\delta^{\text{H-3}} (Z) < \delta^{\text{H-3}} (E) \text{ and}$$

$$\delta^{\text{NH}} (Z) < \delta^{\text{NH}} (E)$$

For **11a** and **21**, the following chemical shifts were observed:

(*Z*)-**11a**: 6.19 (NH), 6.38 (H-3)

(*Z*)-**21**: 6.45 (H-3, NH)

(*E*)-**11a**: 6.66 (H-3), 6.74 (NH)

(*E*)-**21**: 6.76 (H-3), 6.98 (NH)

These data are in complete agreement with the established criteria and therefore reveal the (*Z*)-configured didehydro amino acids to be the main products of the respective Wittig-Horner reactions.

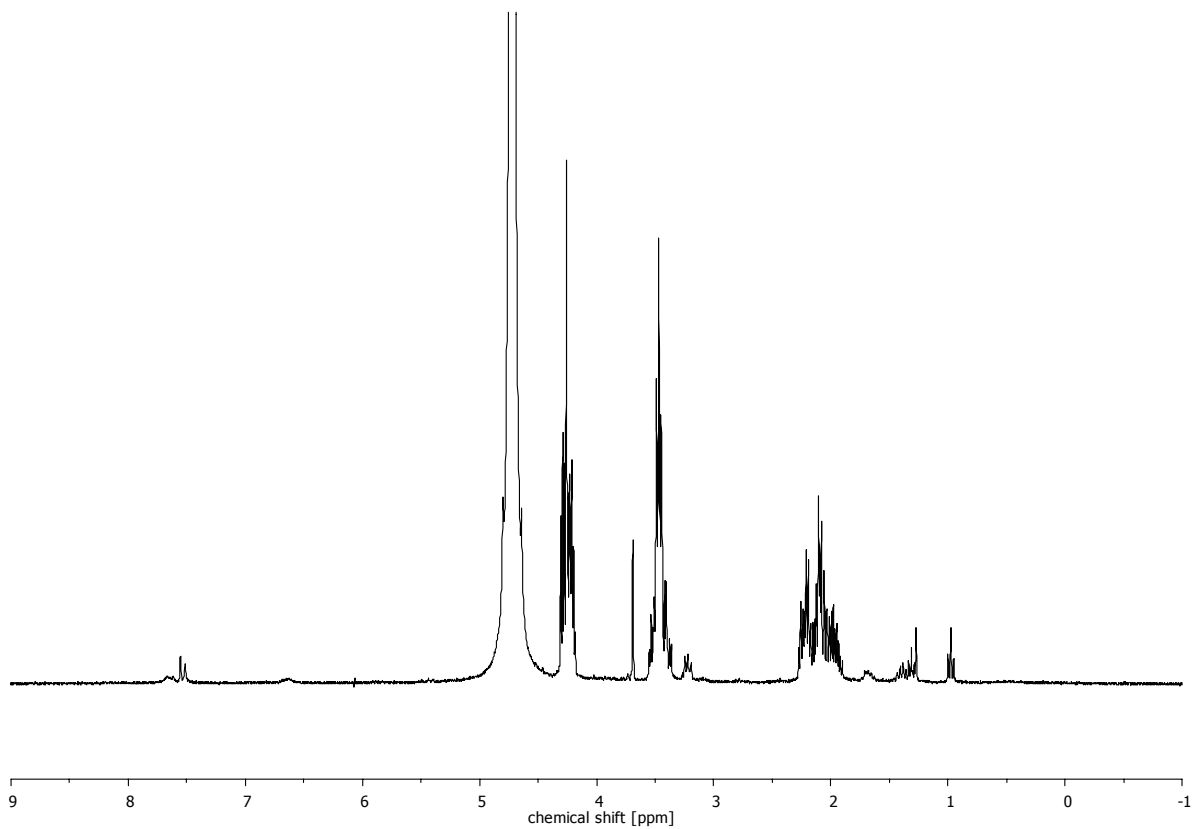

$^1\text{H}$  NMR spectrum of the mixture of *(rac)*-**1** · 2 HCl and *(rac)*-**2** · 2 HCl (300 MHz, D<sub>2</sub>O)

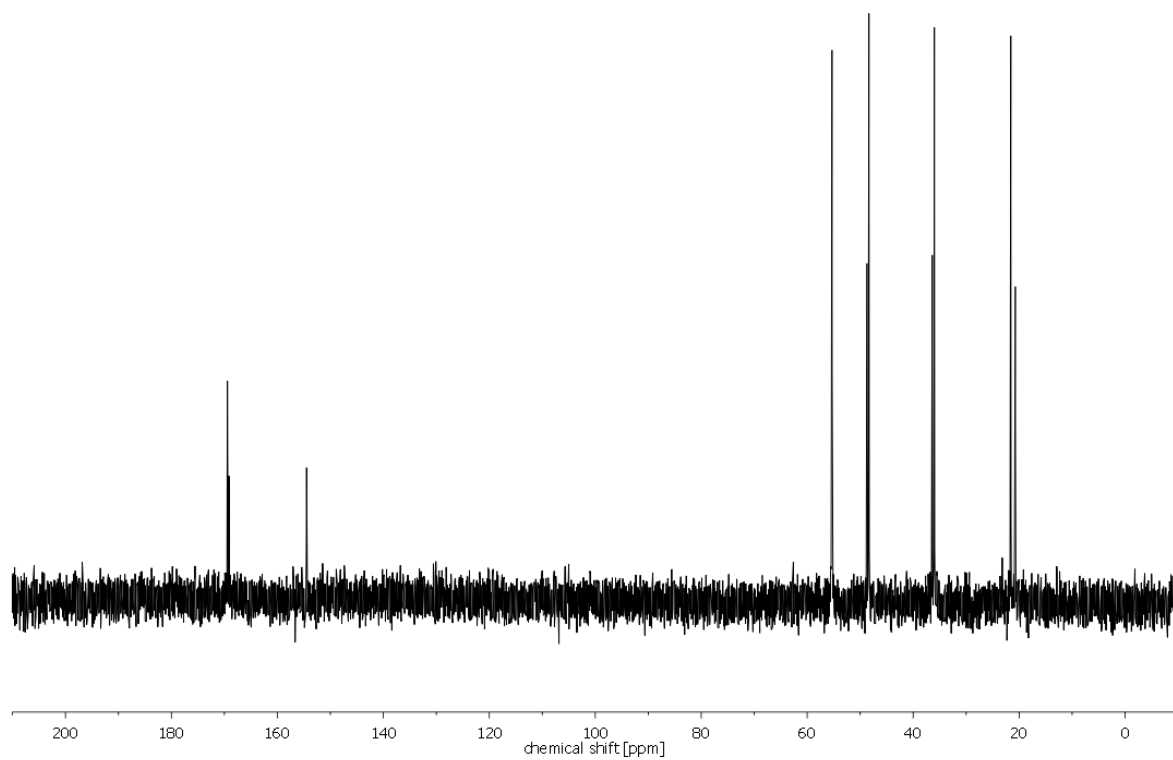

$^{13}\text{C}$  NMR spectrum of the mixture of *(rac)*-**1** · 2 HCl and *(rac)*-**2** · 2 HCl (76 MHz, D<sub>2</sub>O)

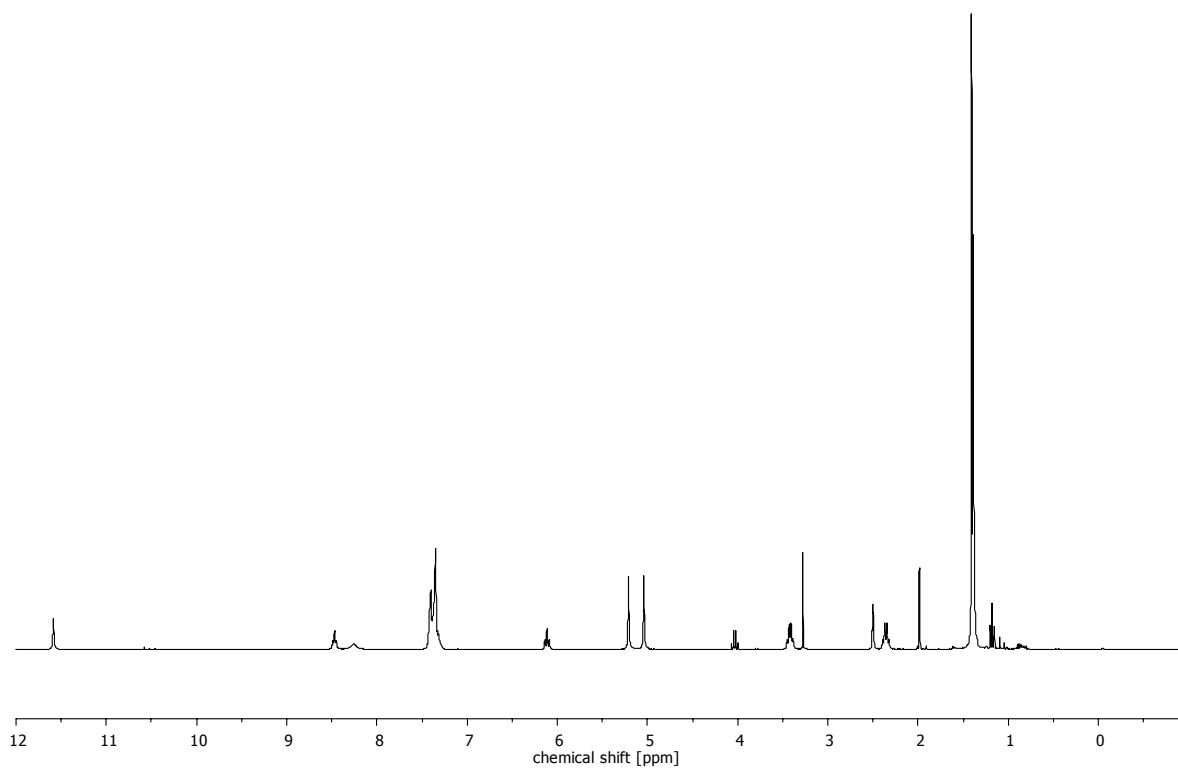

$^1\text{H}$  NMR spectrum of **8e** (300 MHz, DMSO- $\text{d}_6$ )

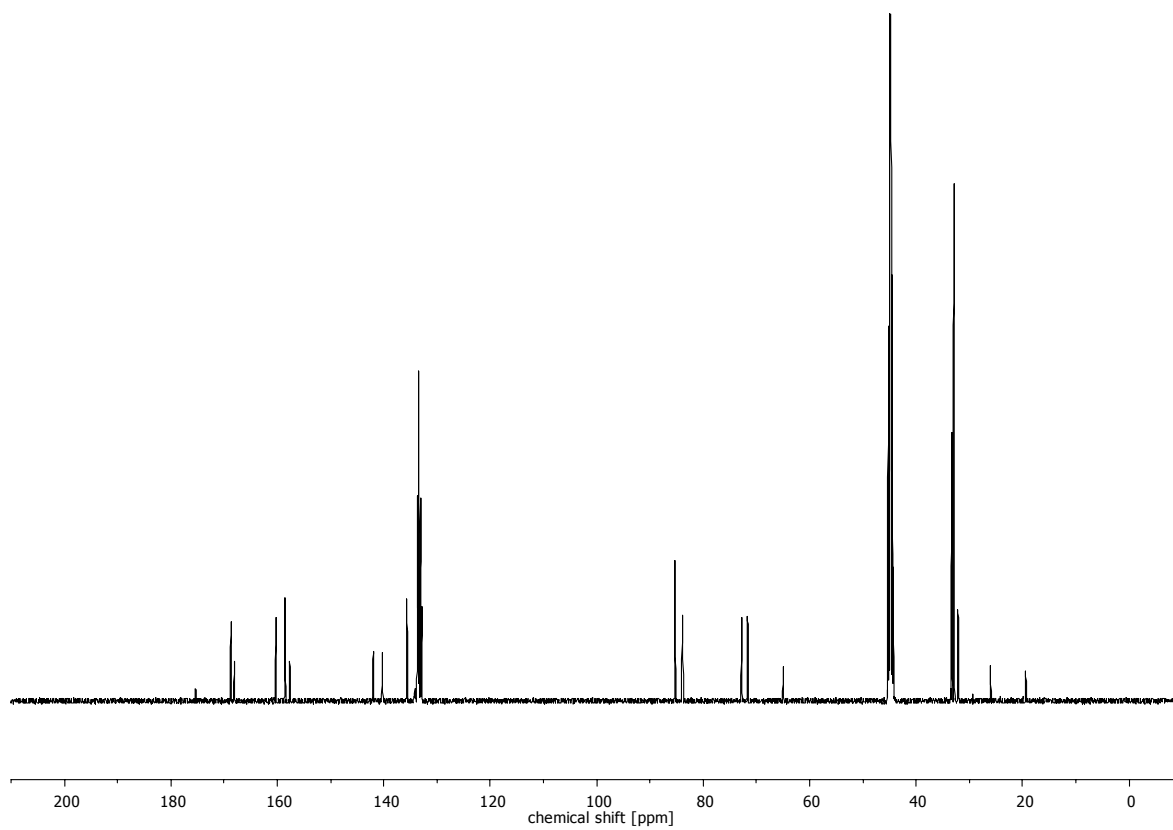

$^{13}\text{C}$  NMR spectrum of **8e** (126 MHz, DMSO- $\text{d}_6$ )



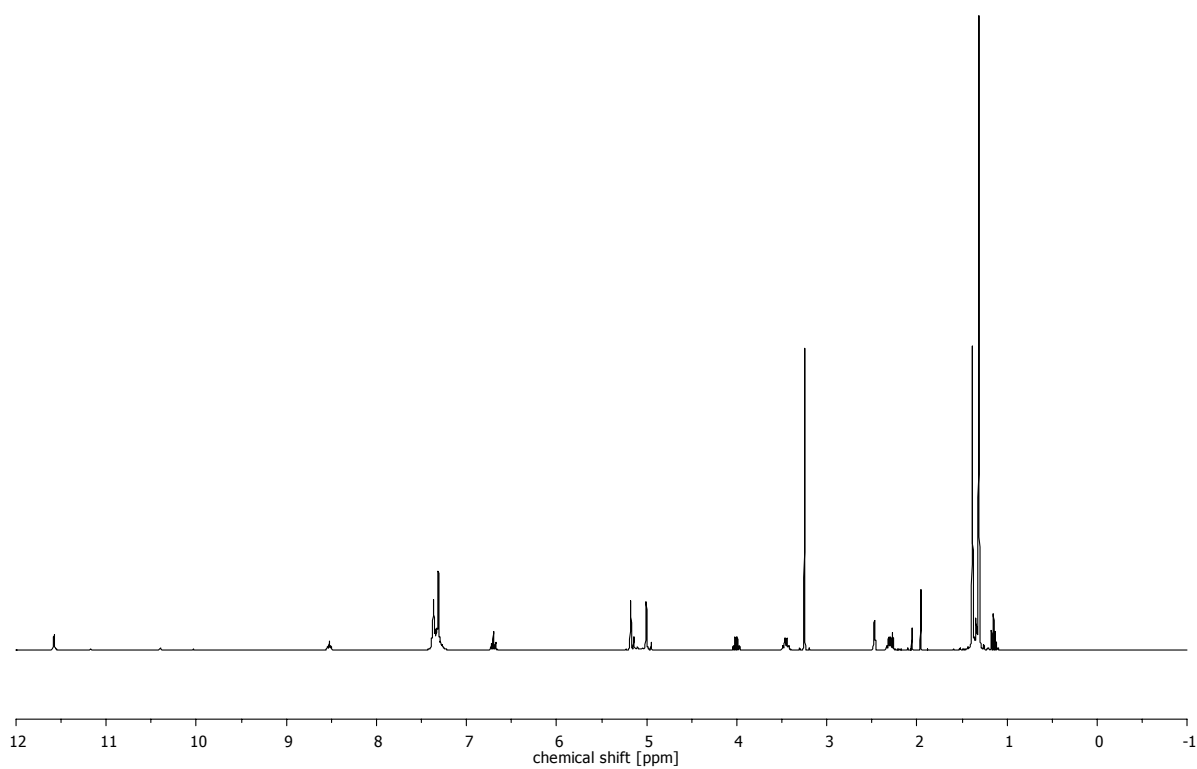

$^1\text{H}$  NMR spectrum of **8g** (300 MHz,  $\text{DMSO-d}_6$ )

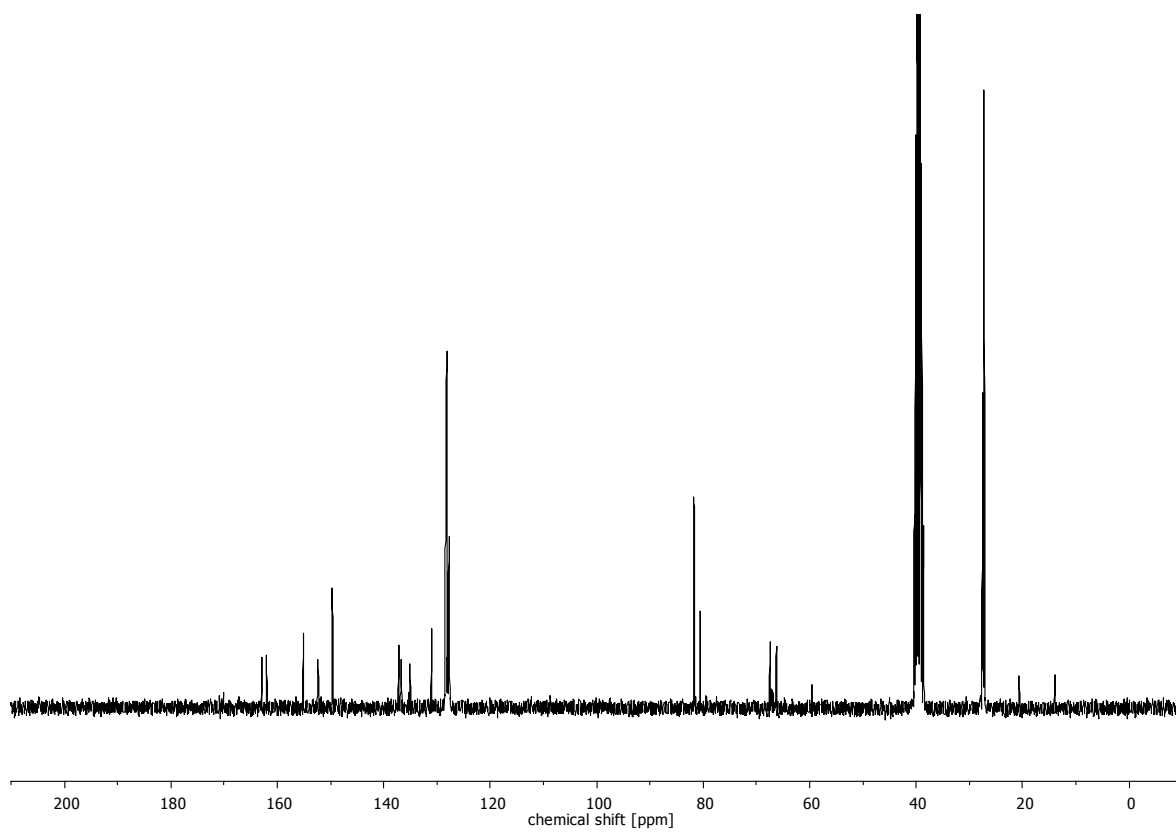

$^{13}\text{C}$  NMR spectrum of **8g** (76 MHz,  $\text{DMSO-d}_6$ )

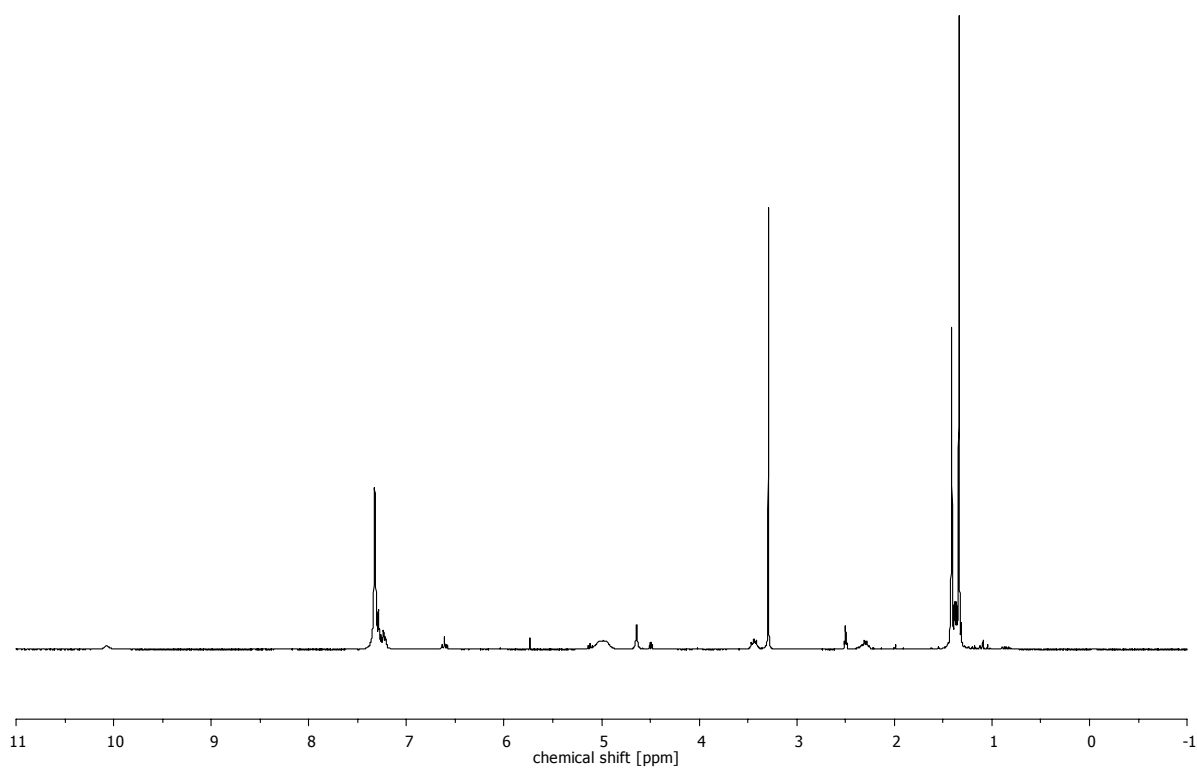

$^1\text{H}$  NMR spectrum of **8h** (300 MHz, DMSO- $\text{d}_6$ )

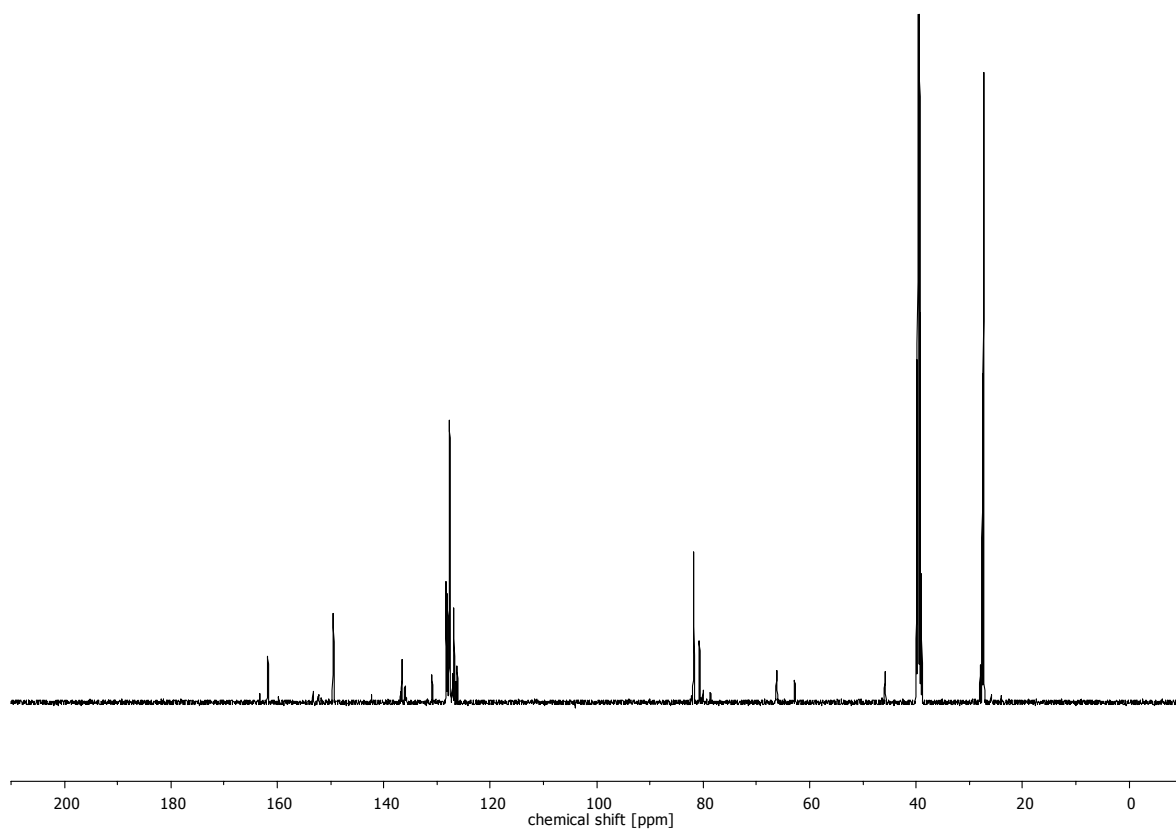

$^{13}\text{C}$  NMR spectrum of **8h** (126 MHz, DMSO- $\text{d}_6$ )

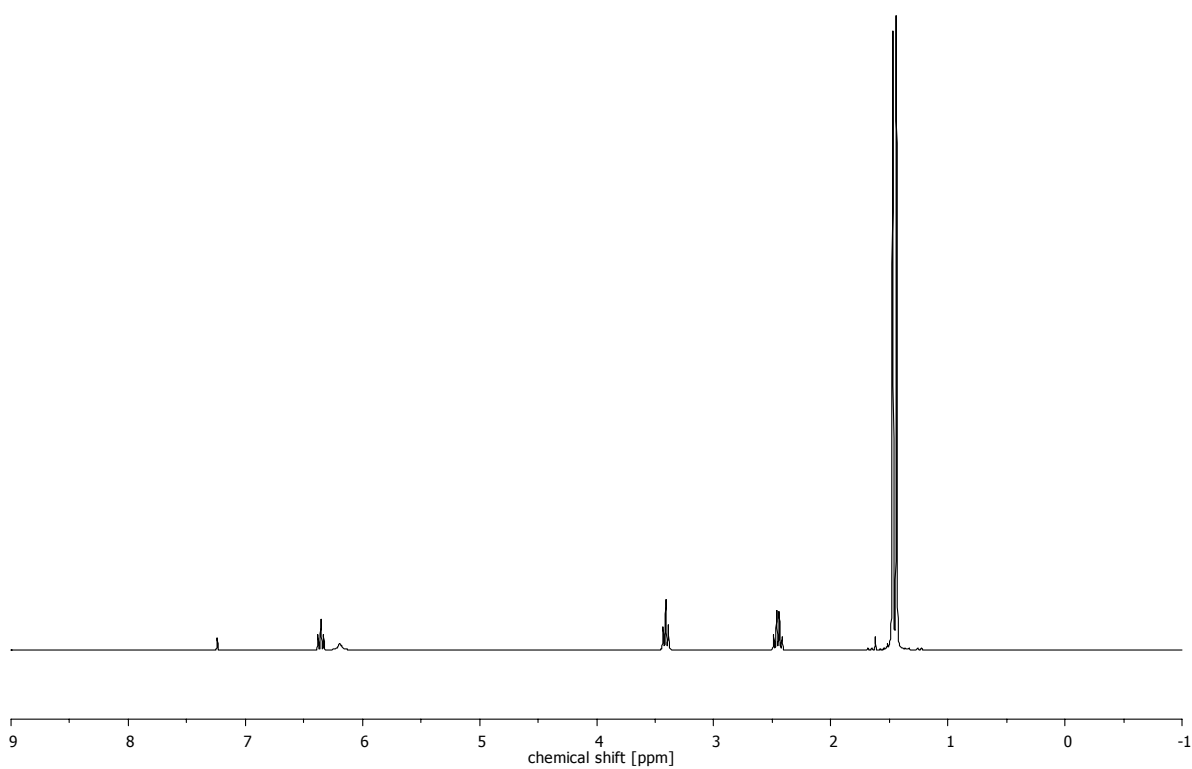

<sup>1</sup>H NMR spectrum of (*Z*)-**11a** (300 MHz, CDCl<sub>3</sub>)

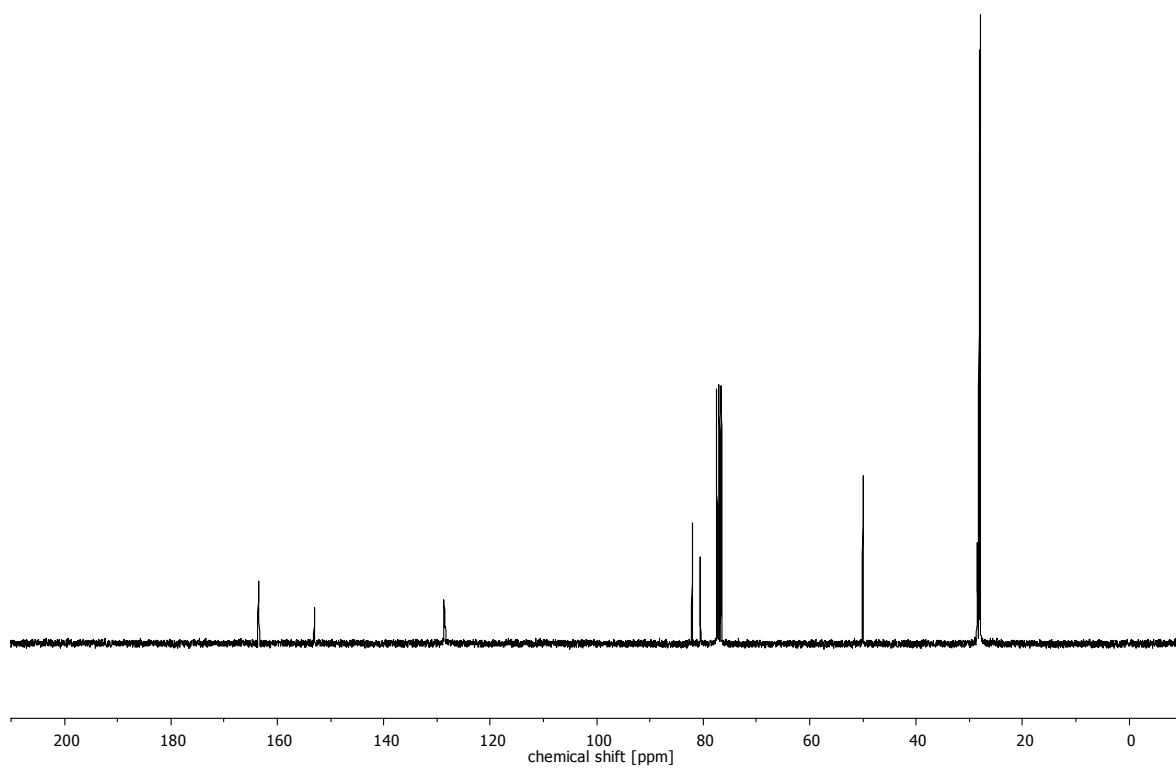

<sup>13</sup>C NMR spectrum of (*Z*)-**11a** (76 MHz, CDCl<sub>3</sub>)



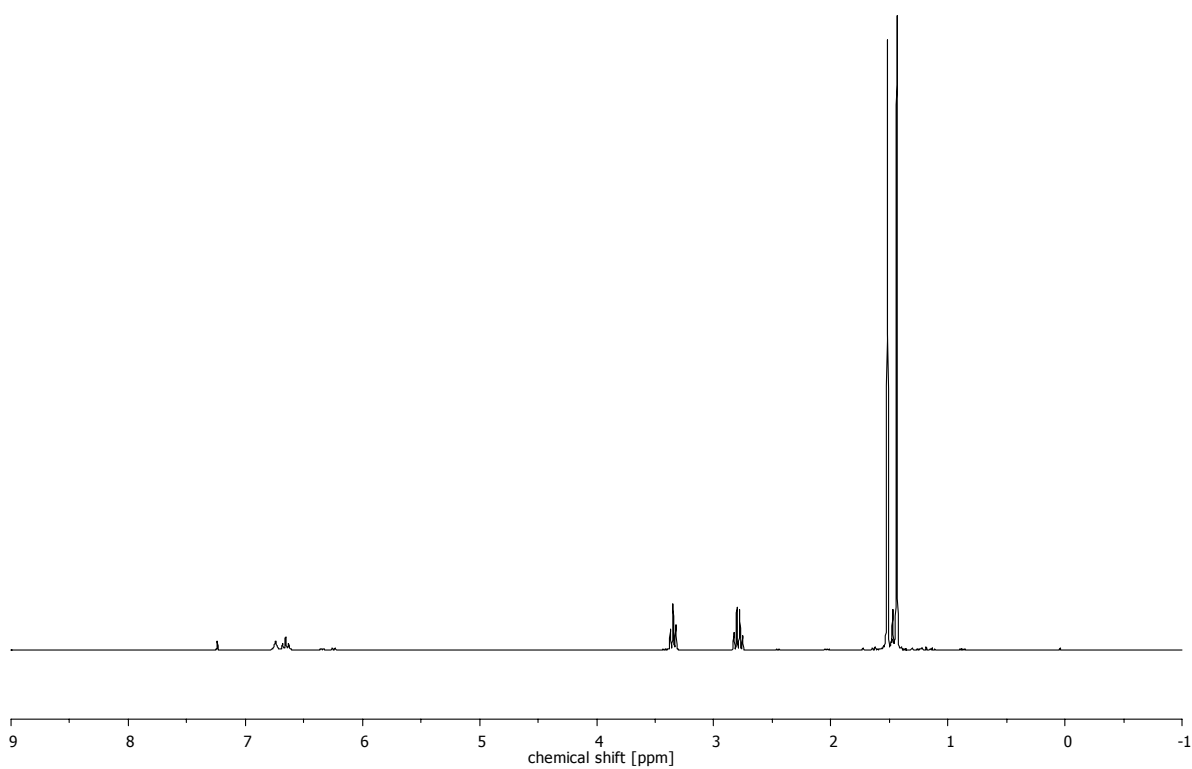

$^1\text{H}$  NMR spectrum of (*E*)-**11a** (300 MHz,  $\text{CDCl}_3$ )

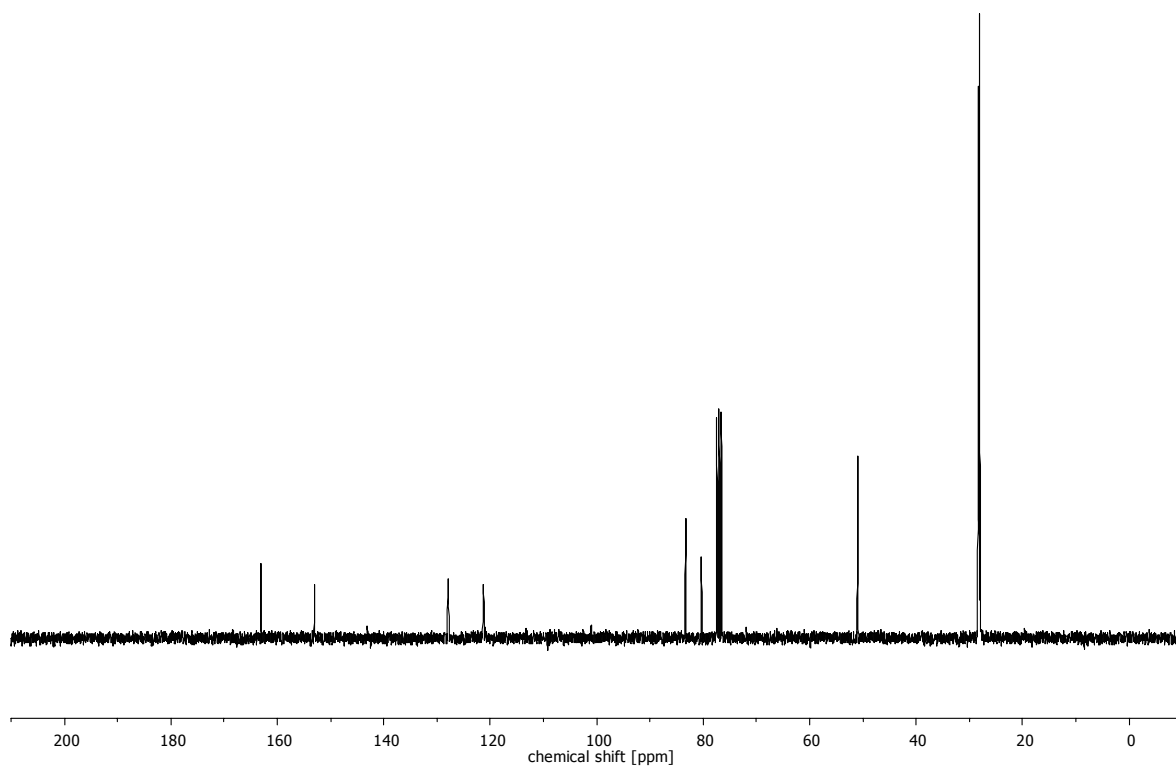

$^{13}\text{C}$  NMR spectrum of (*E*)-**11a** (76 MHz,  $\text{CDCl}_3$ )

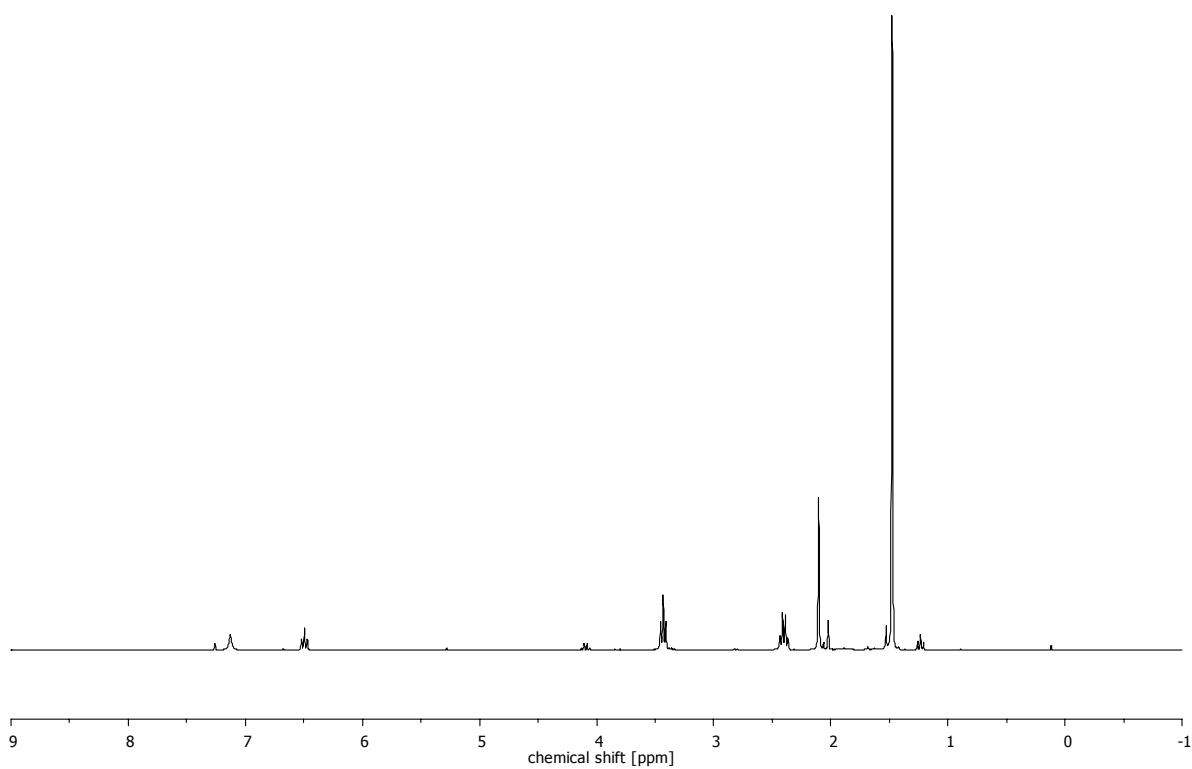

$^1\text{H}$  NMR spectrum of (Z)-11b (300 MHz,  $\text{CDCl}_3$ )

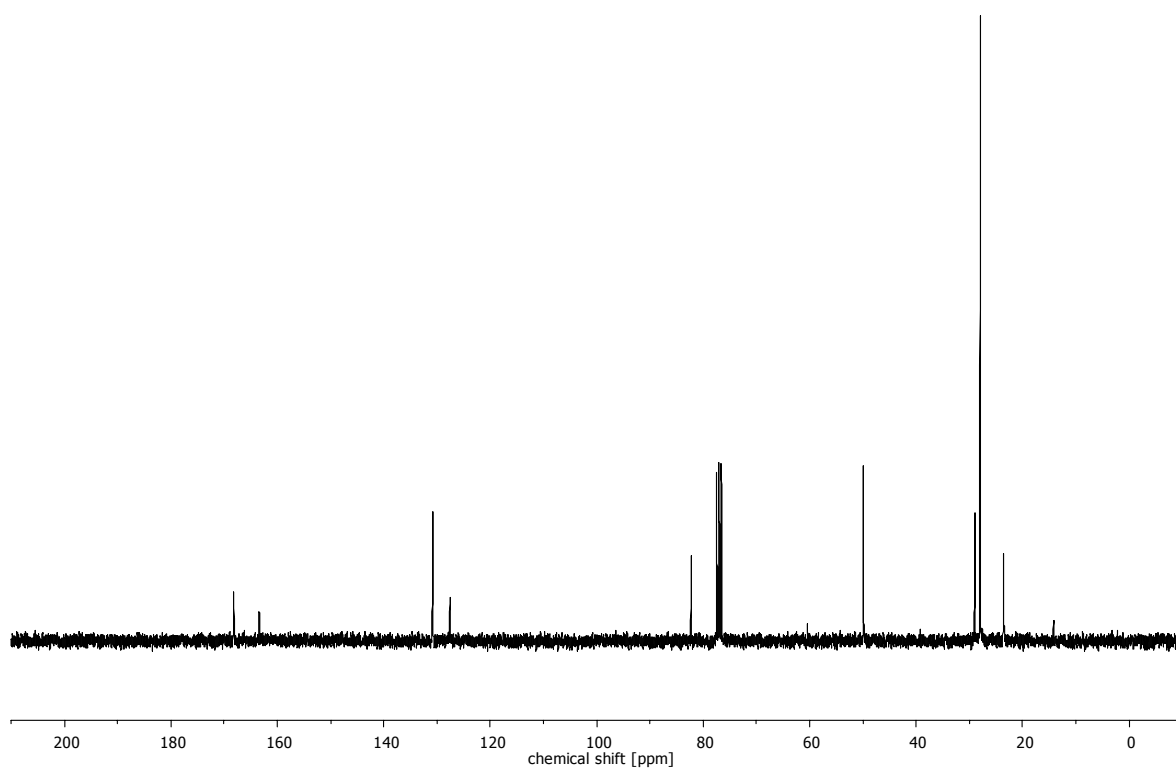

$^{13}\text{C}$  NMR spectrum of (Z)-11b (75 MHz,  $\text{CDCl}_3$ )

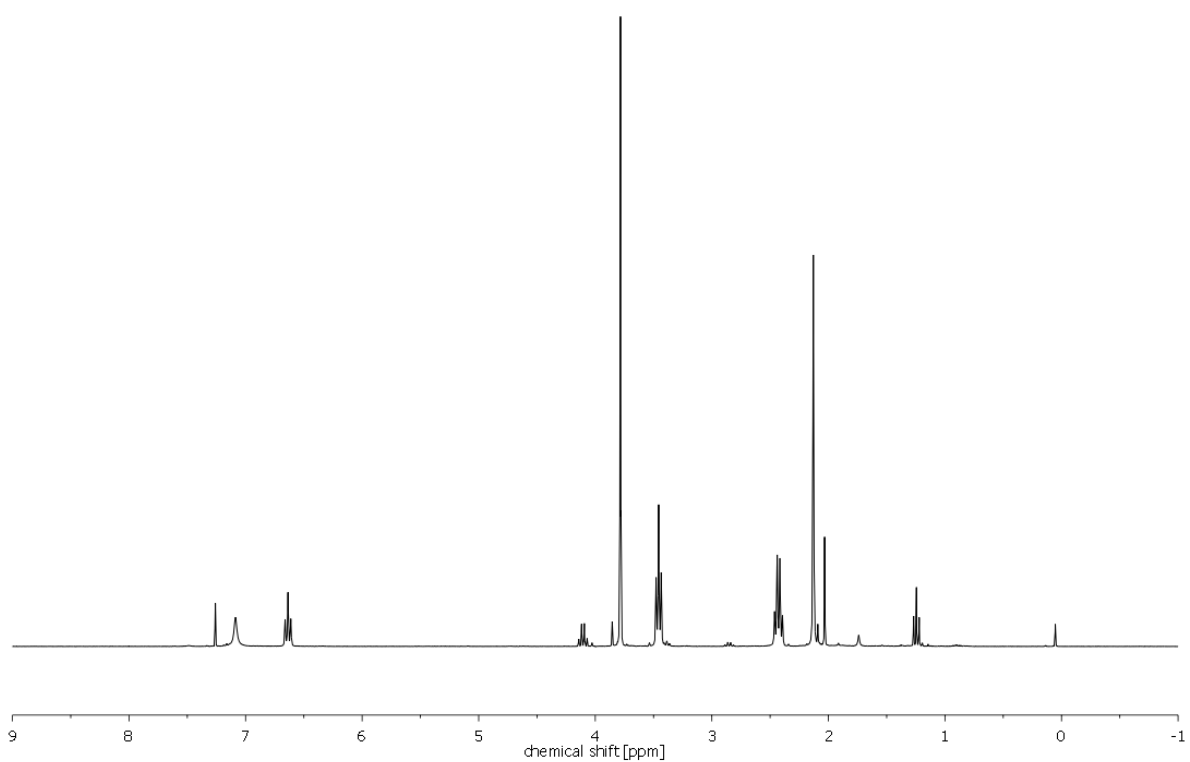

$^1\text{H}$  NMR spectrum of (Z)-11c (300 MHz,  $\text{CDCl}_3$ )

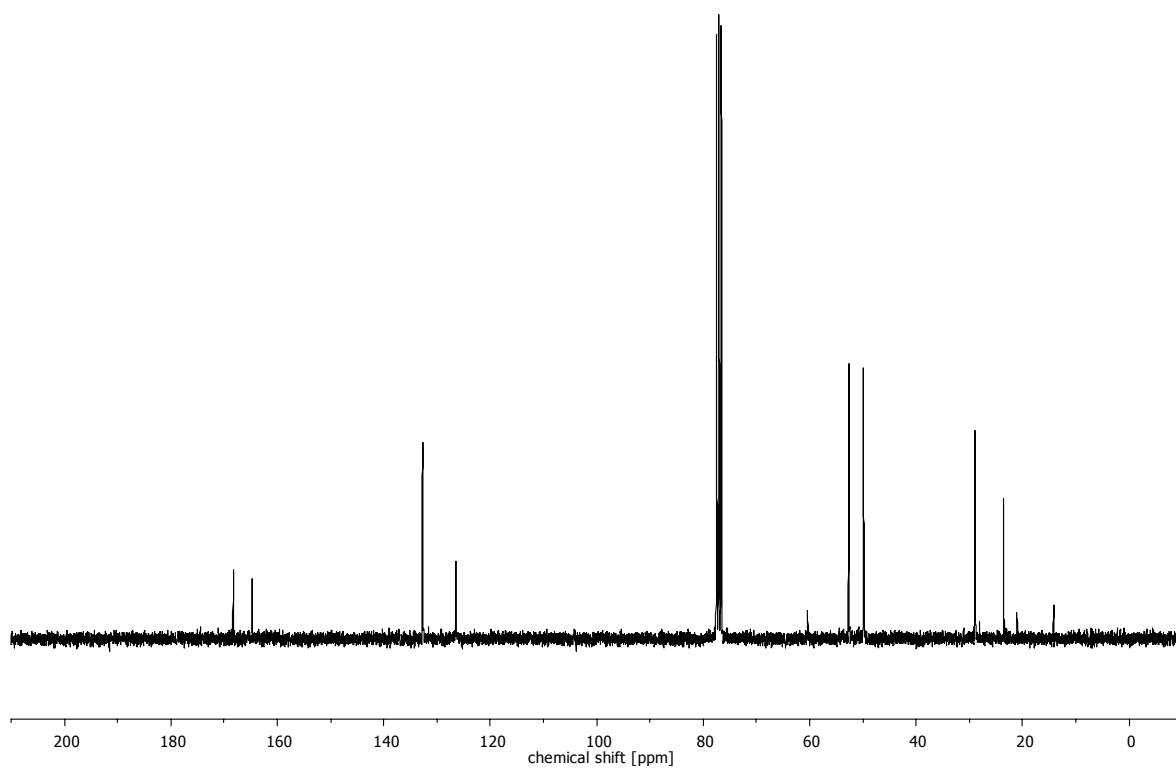

$^{13}\text{C}$  NMR spectrum of (Z)-11c (76 MHz,  $\text{CDCl}_3$ )

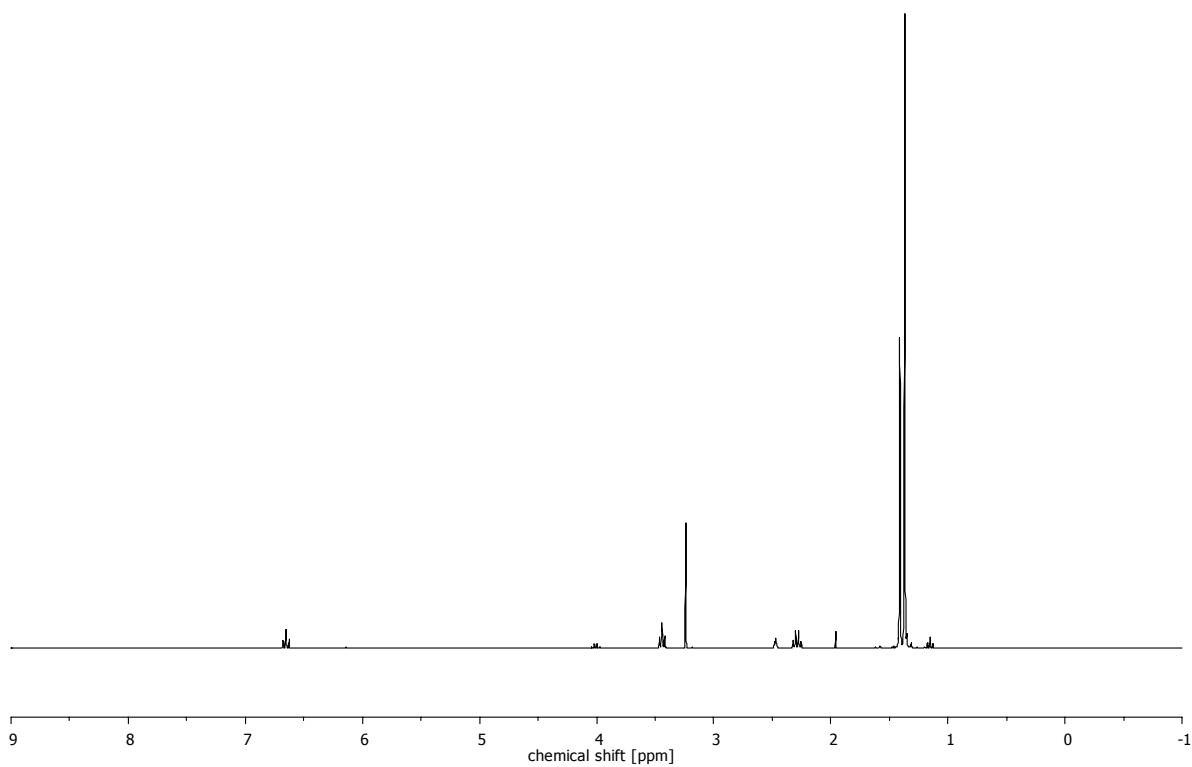

<sup>1</sup>H NMR spectrum of (*Z*)-**11d** (300 MHz, DMSO-*d*<sub>6</sub>)

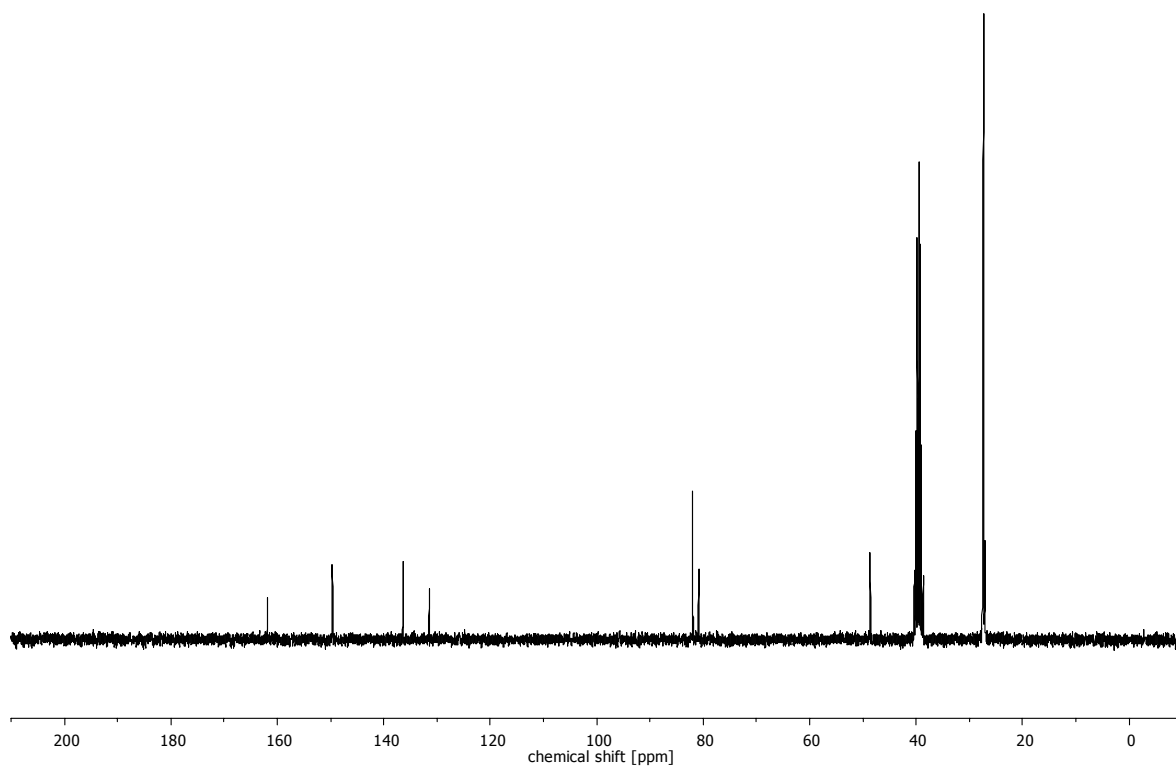

<sup>13</sup>C NMR spectrum of (*Z*)-**11d** (76 MHz, DMSO-*d*<sub>6</sub>)

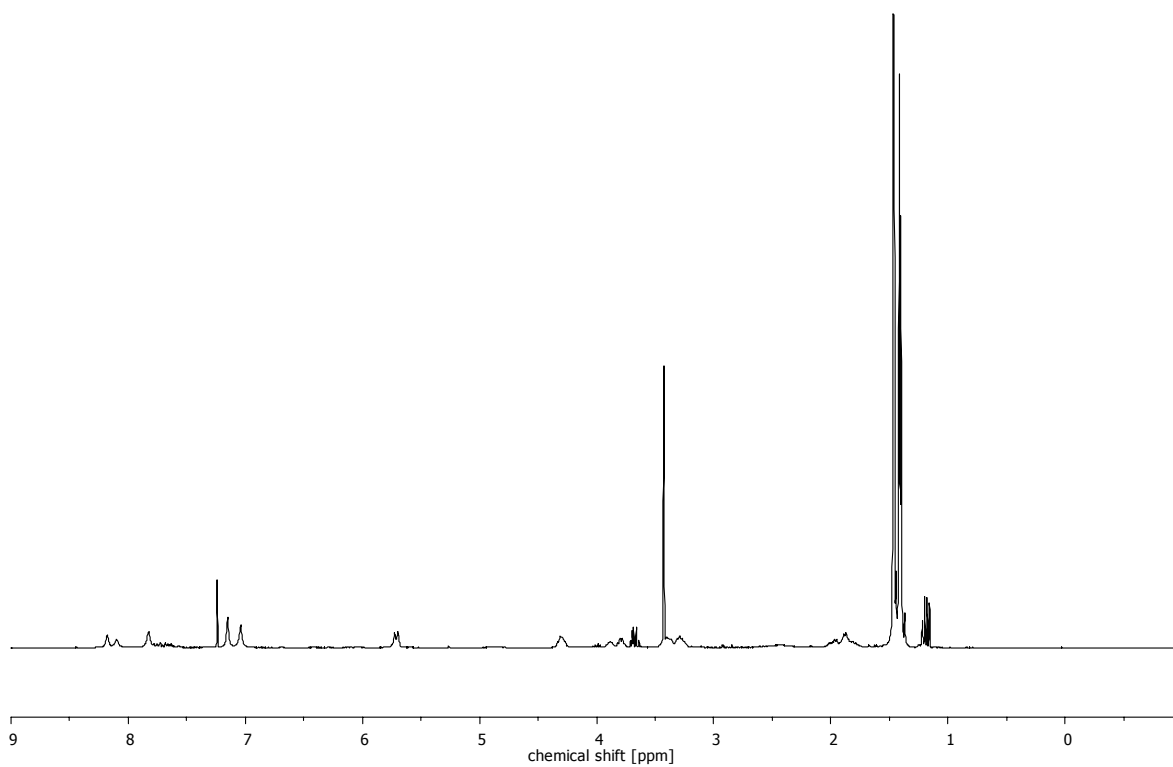

<sup>1</sup>H NMR spectrum of the mixture of (*rac*)-**14** and (*rac*)-**15** (300 MHz, CDCl<sub>3</sub>)

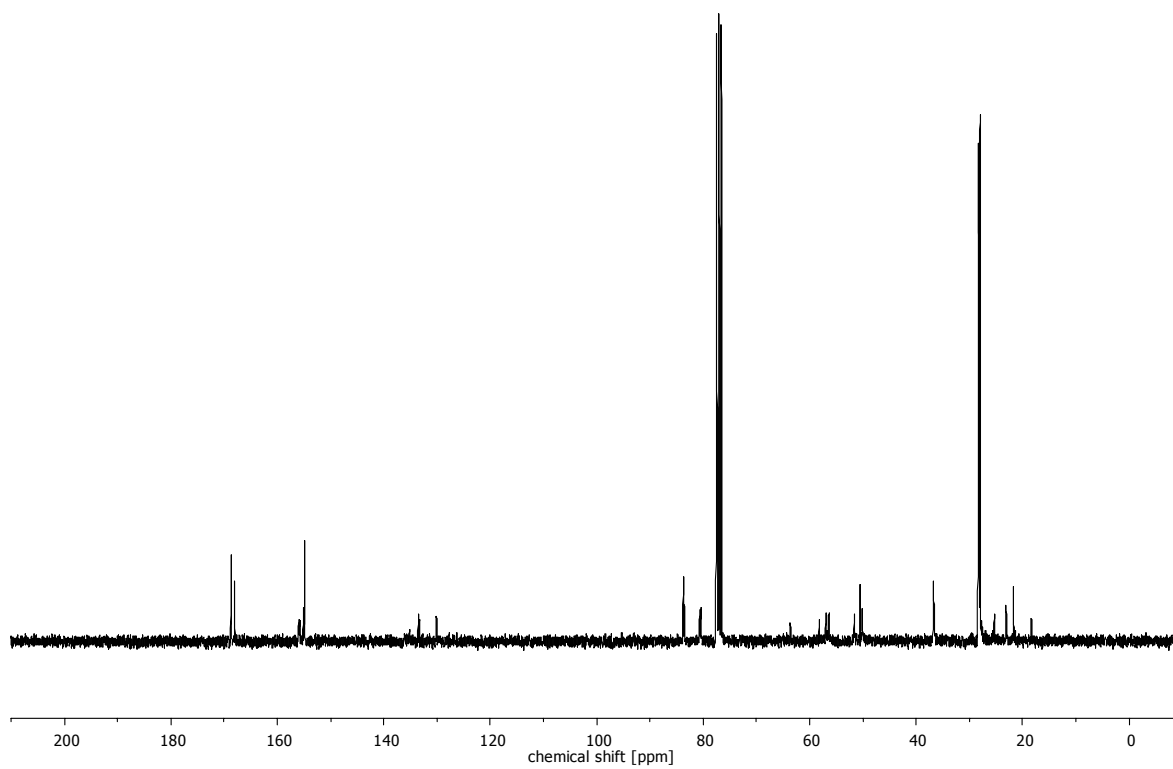

<sup>13</sup>C NMR spectrum of the mixture of (*rac*)-**14** and (*rac*)-**15** (76 MHz, CDCl<sub>3</sub>)

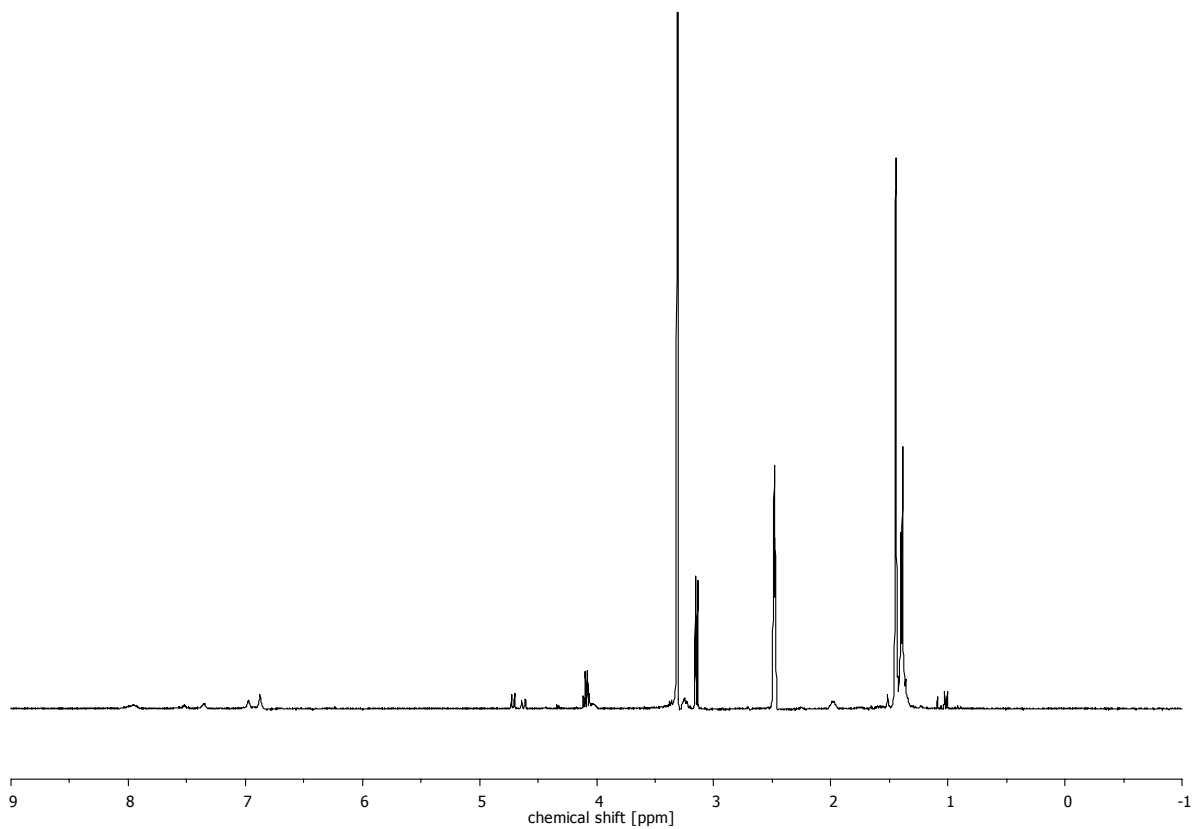

$^1\text{H}$  NMR spectrum of the mixture of (*rac*)-**17** and (*rac*)-**18** (300 MHz, DMSO- $\text{d}_6$ )

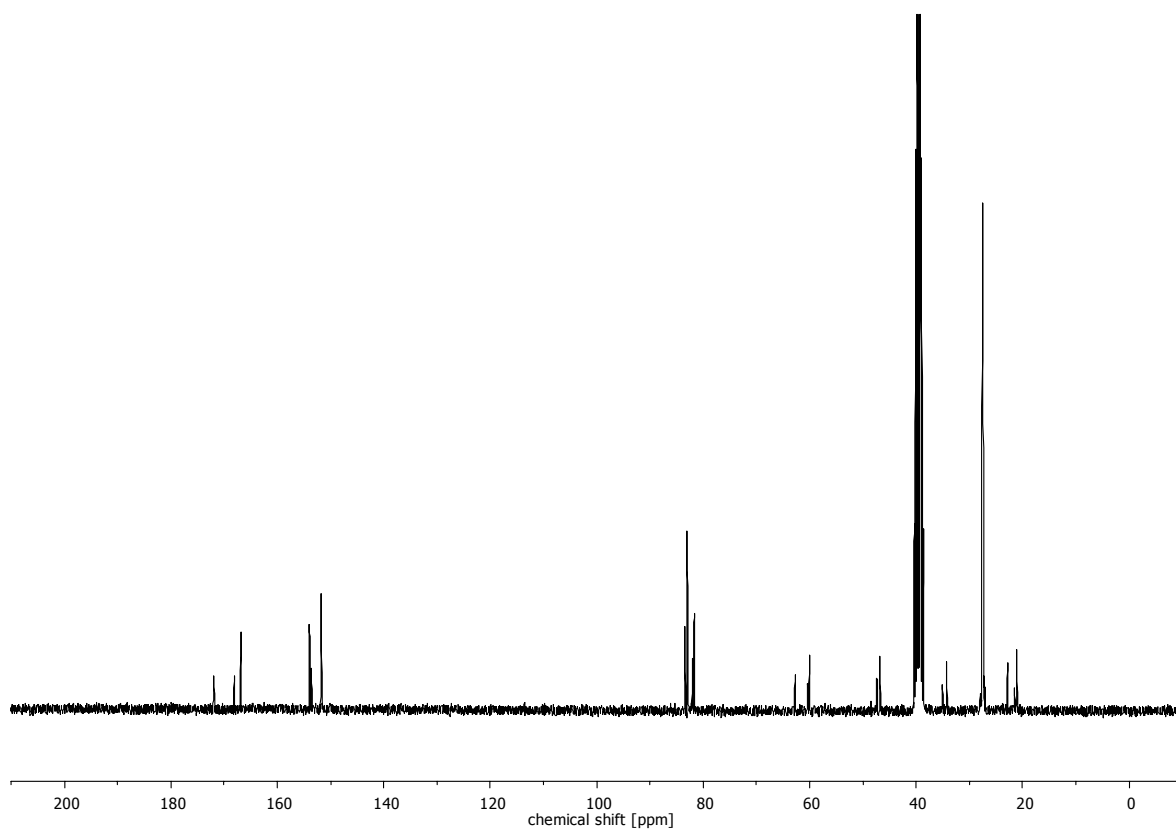

$^{13}\text{C}$  NMR spectrum of the mixture of (*rac*)-**17** and (*rac*)-**18** (76 MHz, DMSO- $\text{d}_6$ )

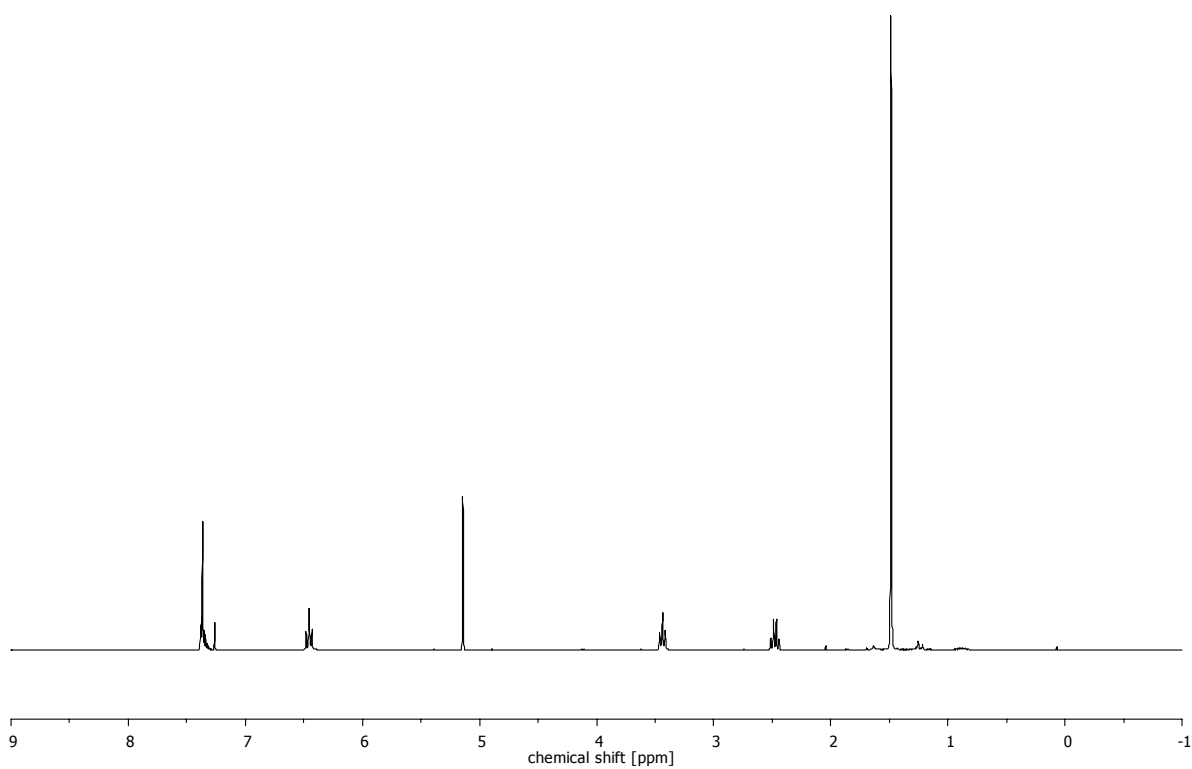

$^1\text{H}$  NMR spectrum of (Z)-21 (300 MHz,  $\text{CDCl}_3$ )

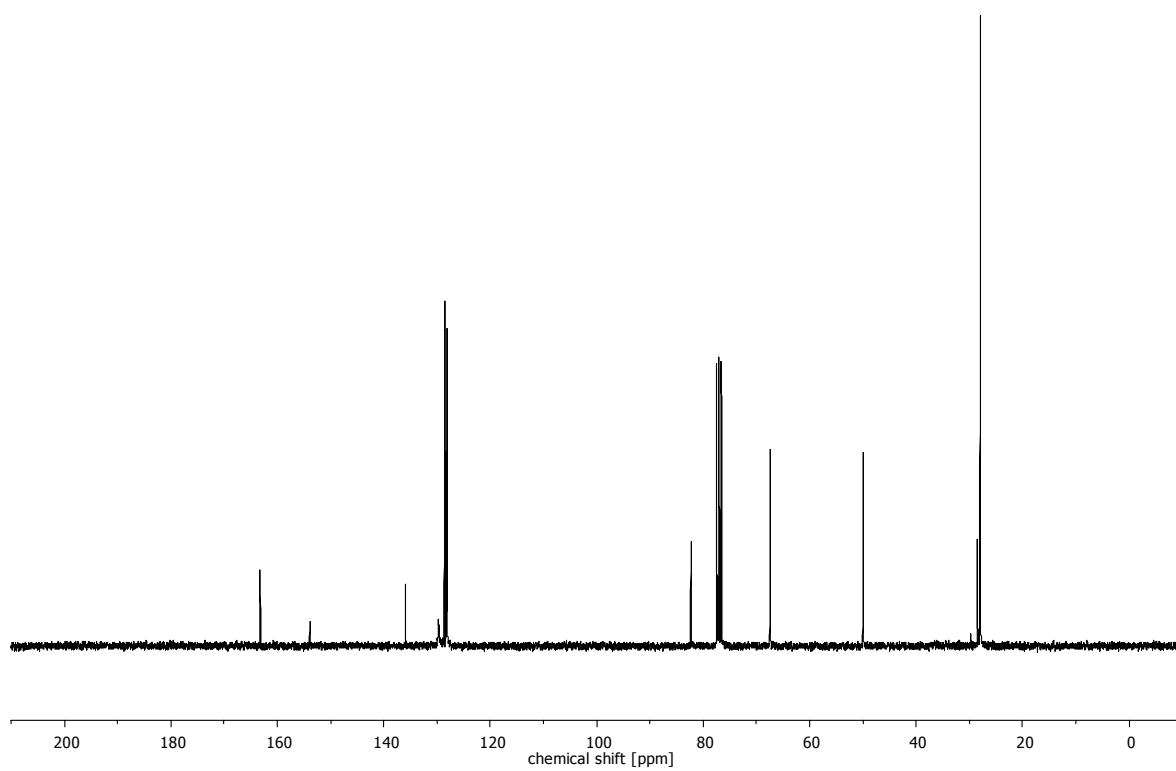

$^{13}\text{C}$  NMR spectrum of (Z)-21 (76 MHz,  $\text{CDCl}_3$ )

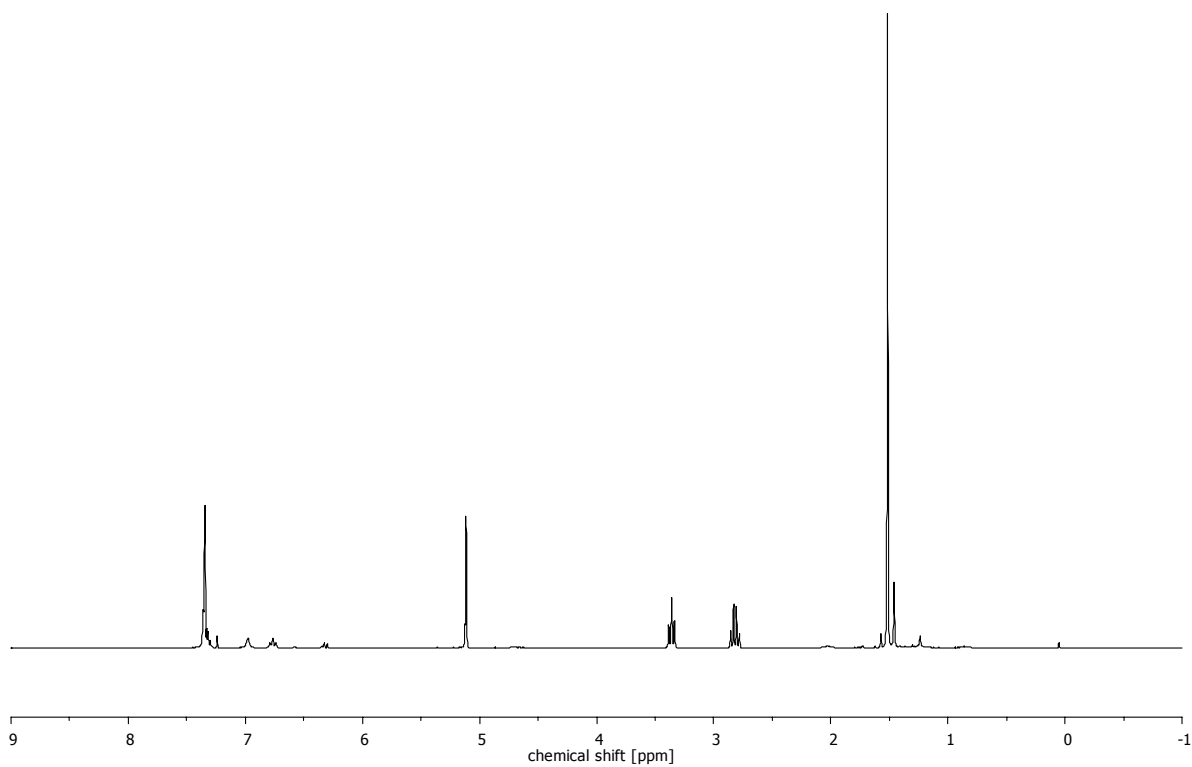

$^1\text{H}$  NMR spectrum of (*E*)-**21** (300 MHz,  $\text{CDCl}_3$ )

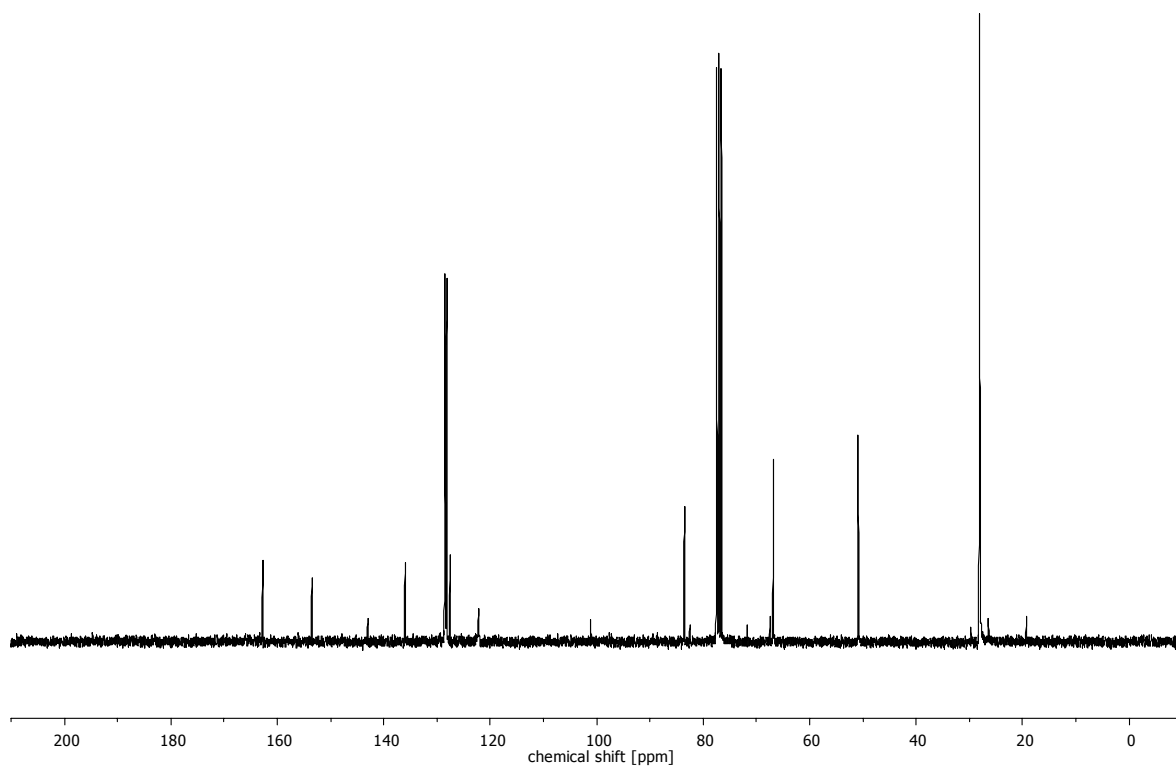

$^{13}\text{C}$  NMR spectrum of (*E*)-**21** (76 MHz,  $\text{CDCl}_3$ )



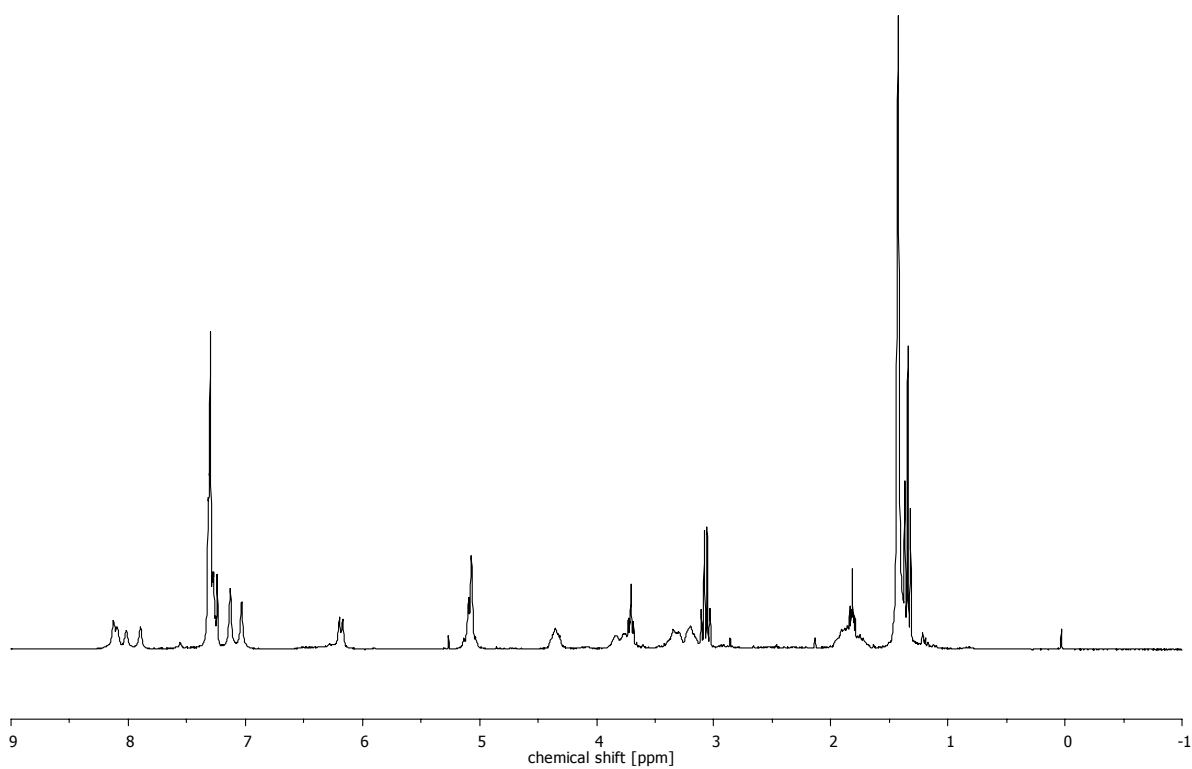

$^1\text{H}$  NMR spectrum of the mixture of (*rac*)-**23** and (*rac*)-**24** (300 MHz,  $\text{CDCl}_3$ )

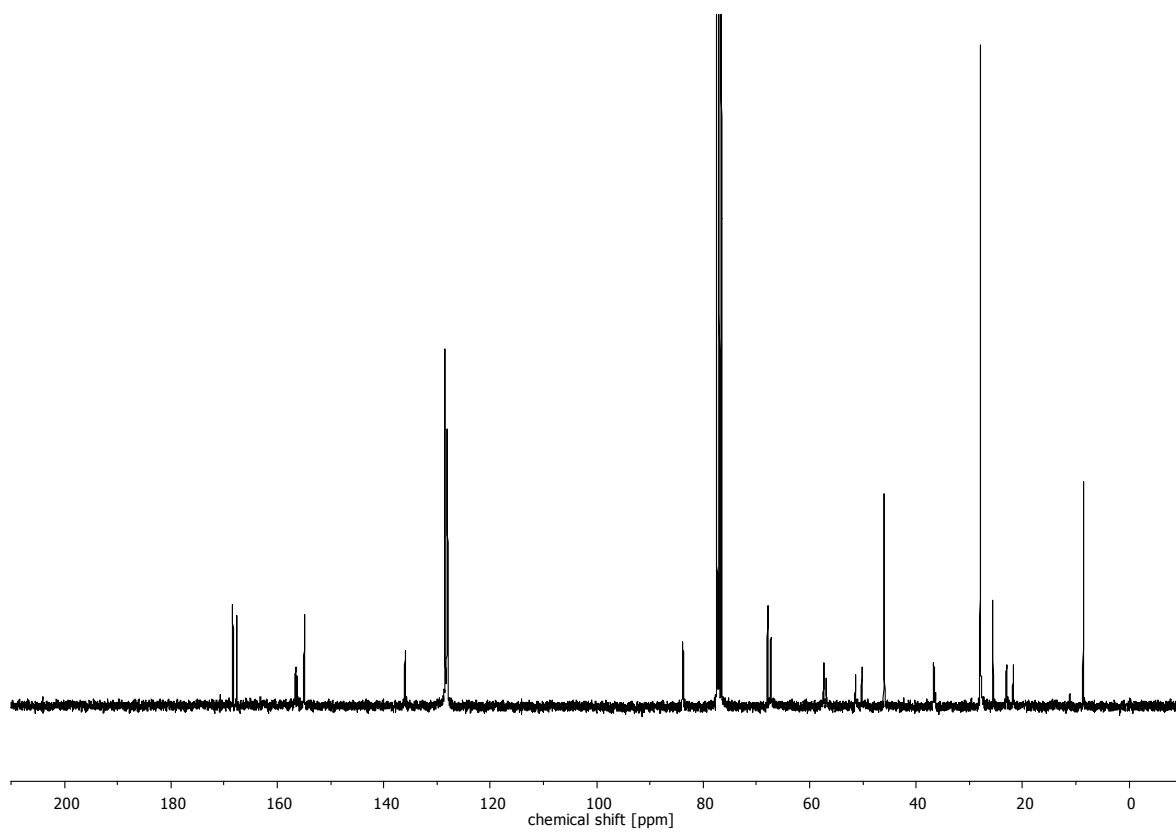

$^{13}\text{C}$  NMR spectrum of the mixture of (*rac*)-**23** and (*rac*)-**24** (76 MHz,  $\text{CDCl}_3$ )

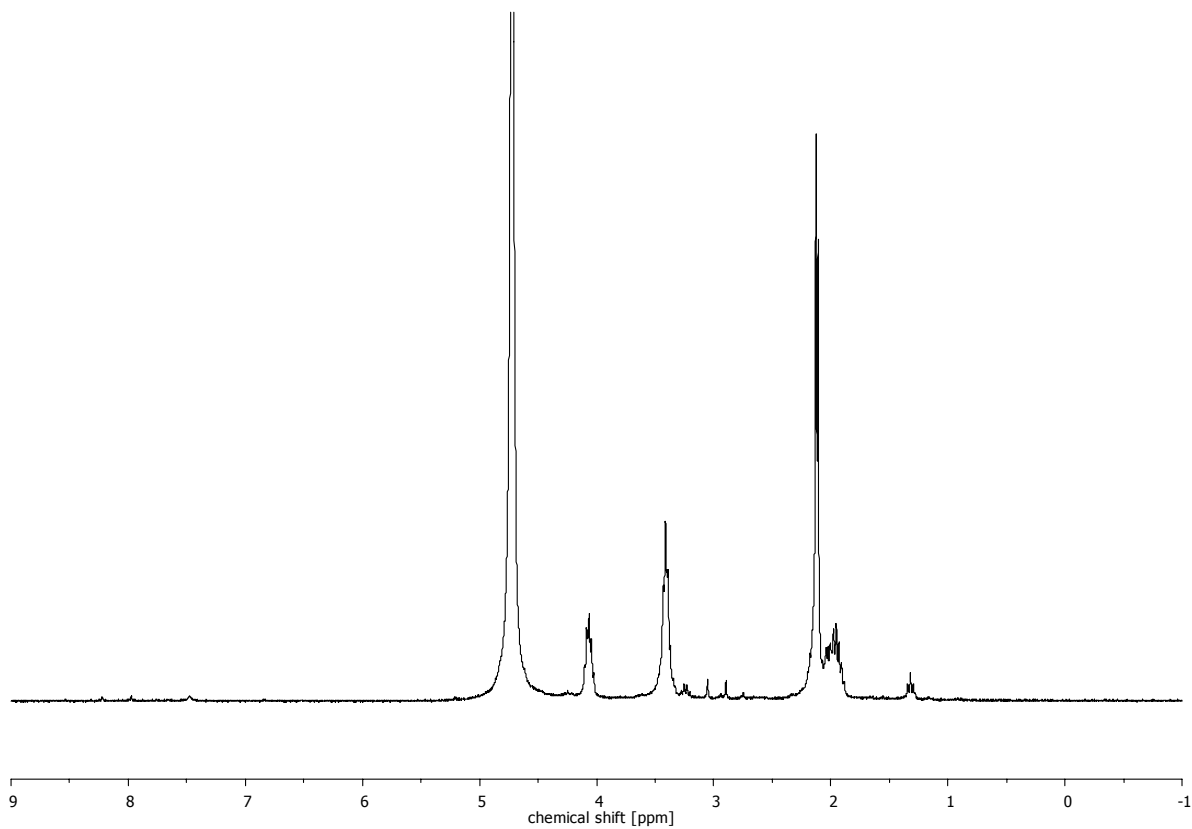

<sup>1</sup>H NMR spectrum of the mixture of (*rac*)-**27** and (*rac*)-**28** (300 MHz, D<sub>2</sub>O)

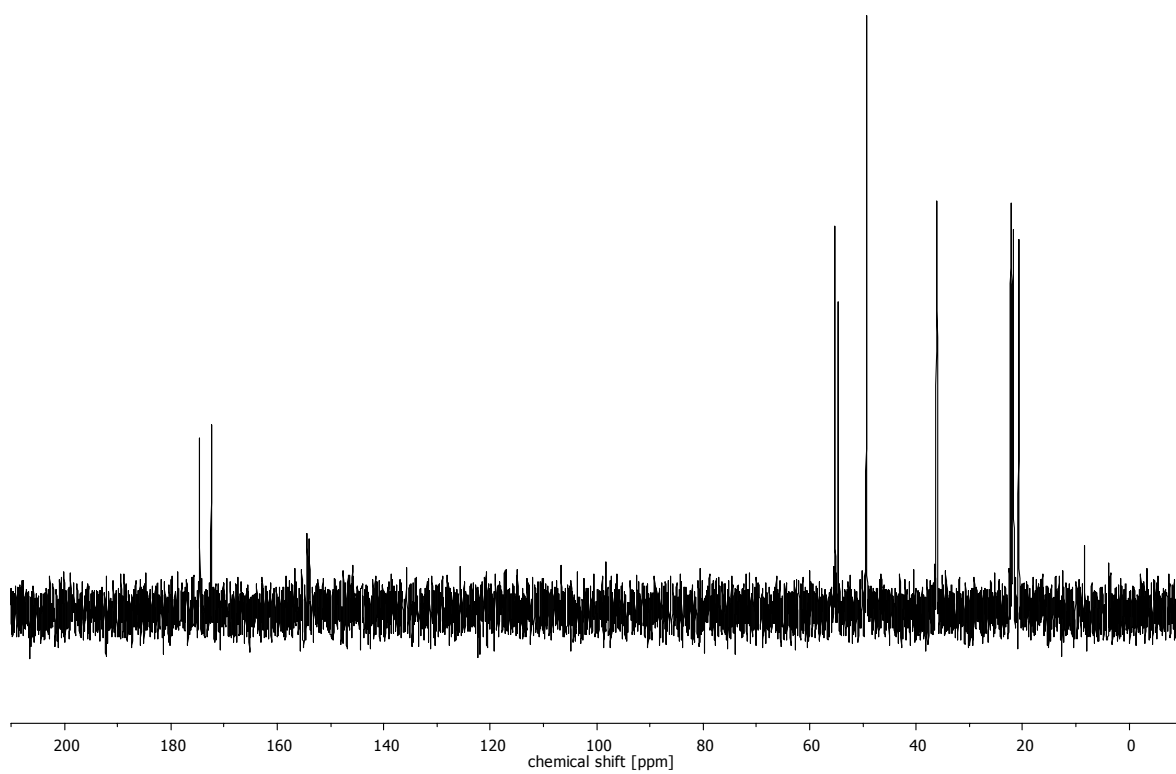

<sup>13</sup>C NMR spectrum of the mixture of (*rac*)-**27** and (*rac*)-**28** (76 MHz, D<sub>2</sub>O)

## Data on the X-ray crystal structure of (Z)-11a

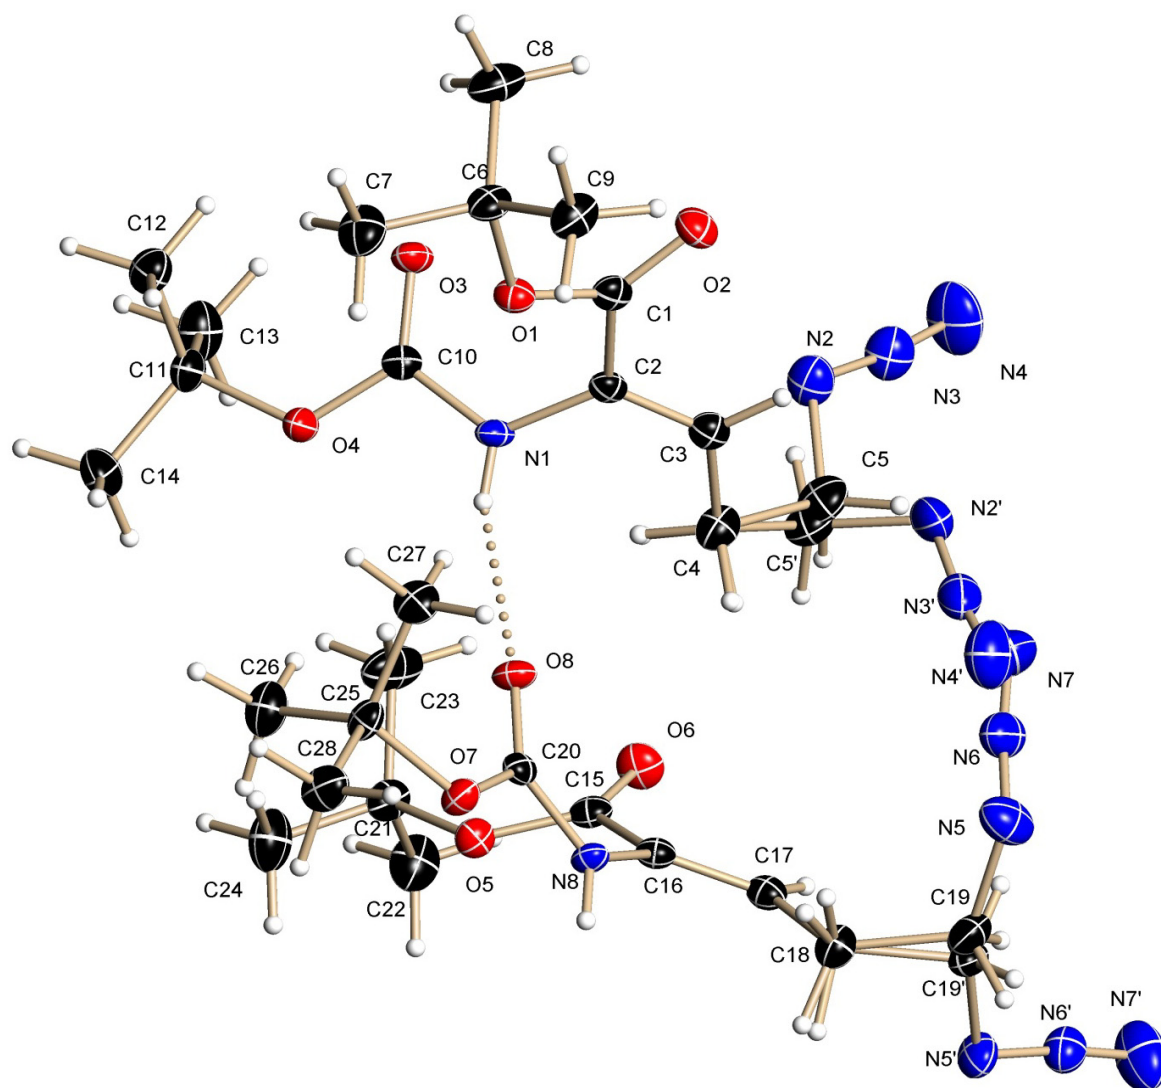

**Figure S1.** Molecular structure of (Z)-11 with ellipsoid shown at 50% probability level. Color code: carbon = black, oxygen = red, nitrogen = blue, hydrogen = white.

The crystal of (Z)-11 was a non-merohedral twin and the two domains were separated using RLATT. The fractional distribution of the second domain refines to 0.4669 (9).

The disorder of the azide groups could be described as a switching between two positions (e.g. N2-N3-N4 to N2'-N3'-N4' and N6-N7-N8 to N6'-N7'-N8' and vice versa). The two positions were found in the density difference map and refined using bond lengths restraints and anisotropic displacement parameter restraints. The position of the hydrogen atoms H1 and

H8 were found in the density difference map and refined using bond lengths similarity restraints.

**Table S1.** Crystallographic data for the structural analysis of (Z)-**11a**

|                                   |                                                               |                |
|-----------------------------------|---------------------------------------------------------------|----------------|
| Identification code               | CCDC 867825                                                   |                |
| Empirical formula                 | C <sub>14</sub> H <sub>24</sub> N <sub>4</sub> O <sub>4</sub> |                |
| Formula weight                    | 312.37                                                        |                |
| Temperature                       | 100(2) K                                                      |                |
| Wavelength                        | 71.073 pm                                                     |                |
| Crystal system                    | Monoclinic                                                    |                |
| Space group                       | P 2 <sub>1</sub> /c                                           |                |
| Unit cell dimensions              | a = 1634.8(3) pm                                              | α = 90°        |
|                                   | b = 1001.7(2) pm                                              | β = 109.24(2)° |
|                                   | c = 2223.5(3) pm                                              | γ = 90°        |
| Volume                            | 3.4378(10) nm <sup>3</sup>                                    |                |
| Z                                 | 8                                                             |                |
| Density (calculated)              | 1.207 Mg/m <sup>3</sup>                                       |                |
| Absorption coefficient            | 0.089 mm <sup>-1</sup>                                        |                |
| F(000)                            | 1344                                                          |                |
| Crystal size                      | 0.15 x 0.10 x 0.08 mm                                         |                |
| Theta range for data collection   | 1.32 to 25.06°.                                               |                |
| Index ranges                      | -19 ≤ h ≤ 18, 0 ≤ k ≤ 11, 0 ≤ l ≤ 26                          |                |
| Reflections collected             | 61887                                                         |                |
| Independent reflections           | 6073 [R(int) = 0.0759]                                        |                |
| Completeness to theta = 25.06°    | 99.7 %                                                        |                |
| Absorption correction             | Semi-empirical from equivalents                               |                |
| Max. and min. transmission        | 0.9705 and 0.8145                                             |                |
| Refinement method                 | Full-matrix least-squares on F <sup>2</sup>                   |                |
| Data / restraints / parameters    | 6073 / 201 / 492                                              |                |
| Goodness-of-fit on F <sup>2</sup> | 1.068                                                         |                |
| Final R indices [I > 2σ(I)]       | R1 = 0.0415, wR2 = 0.0851                                     |                |
| R indices (all data)              | R1 = 0.0575, wR2 = 0.0911                                     |                |
| Extinction coefficient            | 0.0019(3)                                                     |                |
| Largest diff. peak and hole       | 0.192 and -0.185 e.Å <sup>-3</sup>                            |                |
